# Supplementary material for: Solvothermal synthesis of MIL–53(Fe) hybrid magnetic composites for photoelectrochemical water oxidation and organic pollutant photodegradation under visible light
Source: Royal Society of Chemistry journal article supplement (doi:10.1039/c4ta04622f), 2014-12-09
Supplement: c4ta04622f1.pdf [file c4ta04622f1.pdf]

**Electronic Supplementary Information (ESI) for**

**Solvothermal synthesis of MIL-53(Fe) hybrid magnetic composite for photoelectrochemical water oxidation and organic pollutant photodegradation under visible light**

Caihong Zhang, Lunhong Ai\*, and Jing Jiang\*

Chemical Synthesis and Pollution Control Key Laboratory of Sichuan Province, College of Chemistry and Chemical Engineering, China West Normal University, Shida Road 1, Nanchong 637002, P.R. China. E-mail: ah\_aihong@163.com (L. Ai); 0826zjjh@163.com (J. Jiang); Tel/Fax: +86-817-2568081

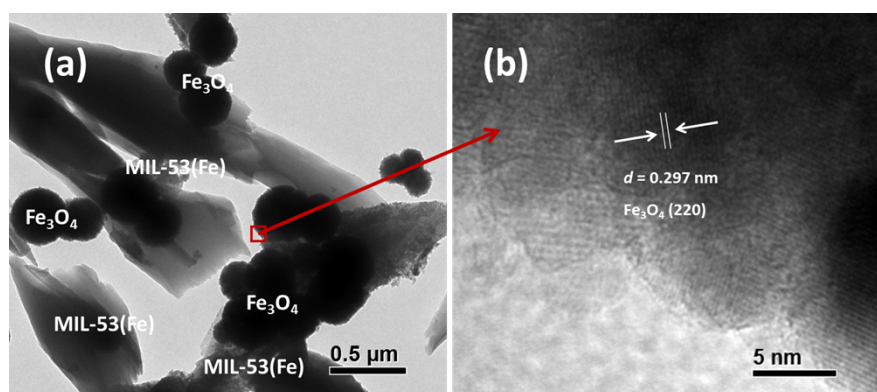

**Fig. S1** TEM (a) and HRTEM (b) of the MHMCs

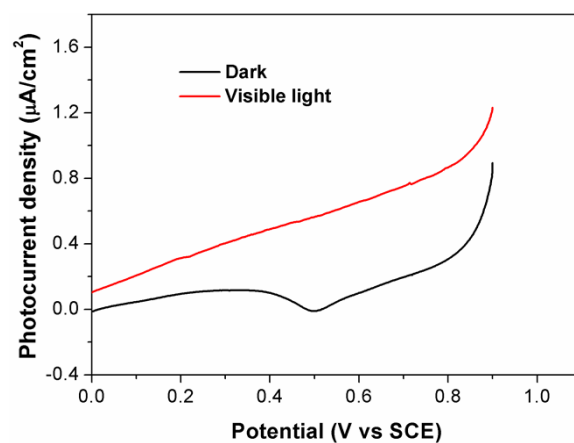

**Fig. S2** Linear-sweep voltammograms of the  $\text{Fe}_2\text{O}_3$  film electrode collected with a scan rate of 10  $\text{mV} \cdot \text{s}^{-1}$  in dark and under visible light illumination in 0.5 M  $\text{Na}_2\text{SO}_4$  aqueous solutions.

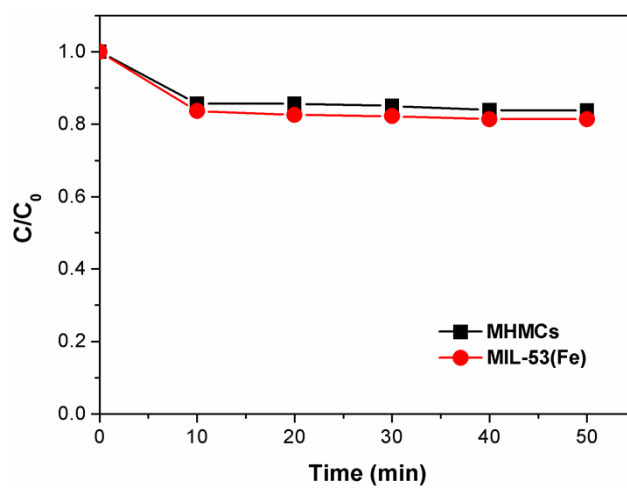

**Fig. S3** Time profiles of adsorption of RhB over the MHMCs and MIL-53(Fe) in the dark.

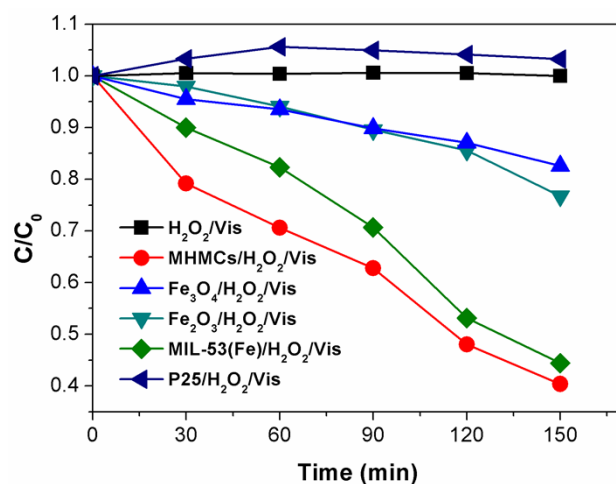

**Fig. S4** Degradation of PNP in different photocatalytic systems under visible light irradiation

(experimental conditions: PNP, 10 mg·L<sup>-1</sup>; catalyst dosage, 0.4 g·L<sup>-1</sup>; H<sub>2</sub>O<sub>2</sub>, 20 mM).

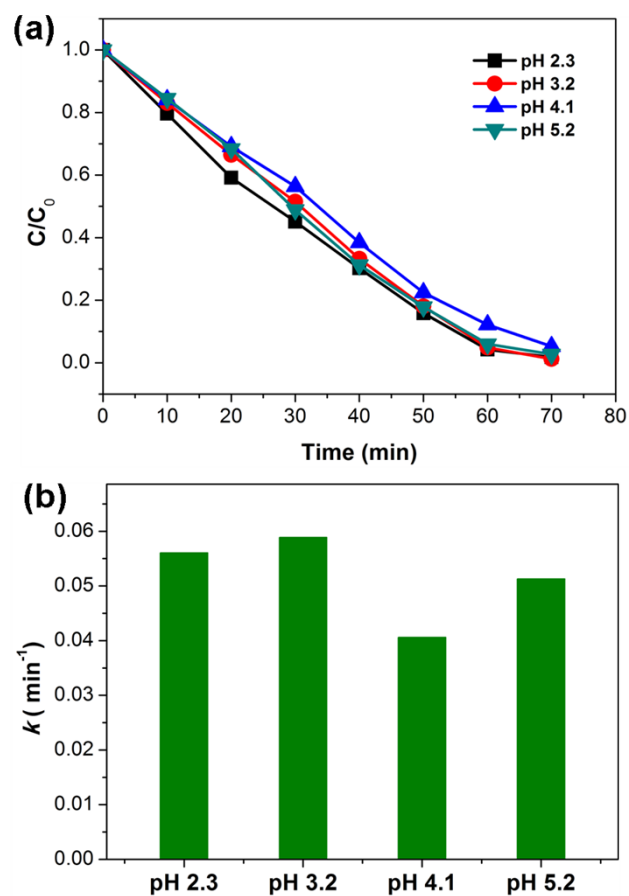

**Fig. S5** (a) Effect of initial pH on the degradation of RhB in MHMCs/H<sub>2</sub>O<sub>2</sub> system under visible

light irradiation. (b) The corresponding apparent reaction rate constants of the photodegradation of

RhB at different initial pH.

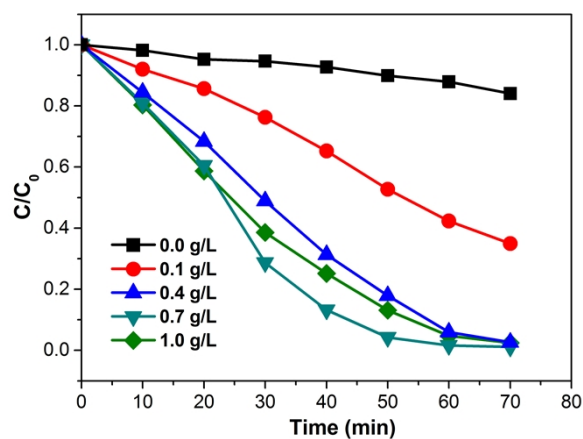

**Fig. S6** Effect of catalyst dosage on the degradation of RhB in MHMCs/H<sub>2</sub>O<sub>2</sub> system under visible light irradiation.

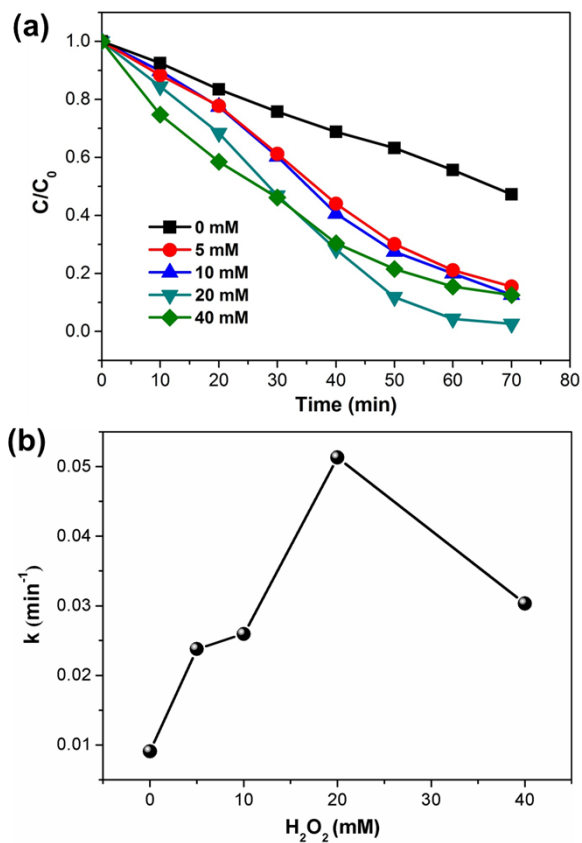

**Fig. S7** (a) Effect of H<sub>2</sub>O<sub>2</sub> concentration on the degradation of RhB in MHMCs/H<sub>2</sub>O<sub>2</sub> system under visible light irradiation. (b) The corresponding apparent reaction rate constants of the photodegradation of RhB at different H<sub>2</sub>O<sub>2</sub> concentration.

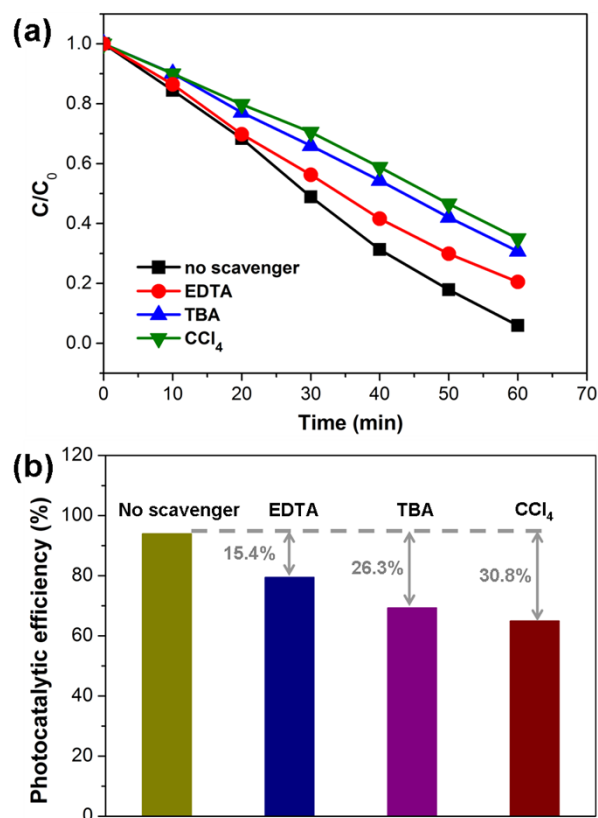

**Fig. S8** (a) Photodegradation of RhB over MHMCs-H<sub>2</sub>O<sub>2</sub> system under visible light irradiation in the presence of trapping systems (scavenger amount: 12 mM). (b) Comparison of the depression efficiency of MHMCs-H<sub>2</sub>O<sub>2</sub> system for the photodegradation of RhB.

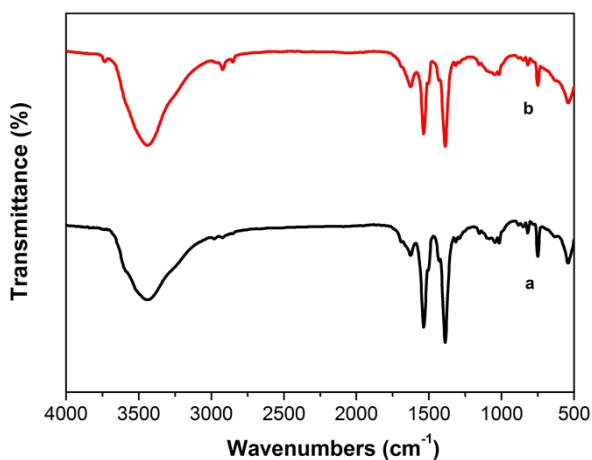

**Fig. S9** FTIR spectra of the MHMCs before (a) and after (b) photocatalytic reaction.

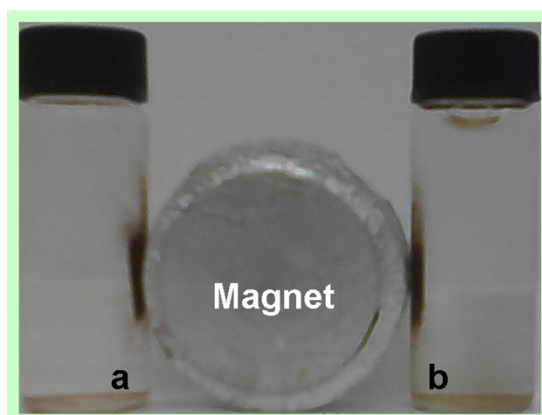

**Fig. S10** Magnetic response of the MHMCs before (a) and after (b) photocatalytic reaction to an external magnetic field.
